# Supplementary material for: Thickness-induced metal–semiconductor transition in LaH2 epitaxial thin films grown by reactive rf magnetron sputtering
Source: Royal Society of Chemistry journal article supplement (doi:10.1039/d4lf00367e), 2025-01-01
Supplement: d4lf00367e1.pdf [file d4lf00367e1.pdf]

## Supplementary Information

### Thickness-induced metal-semiconductor transition in LaH<sub>2</sub> epitaxial thin film grown by reactive rf-magnetron sputtering

Sumireno Uramoto,<sup>a</sup> Hideyuki Kawasoko,<sup>\*b, c</sup> Satoru Miyazaki<sup>a</sup> and Tomoteru Fukumura<sup>a, d</sup>

<sup>a</sup> *Department of Chemistry, Graduate School of Science, Tohoku University, Sendai 980-8578, Japan*

<sup>b</sup> *Department of Chemistry, Graduate School of Science, Tokyo Metropolitan University, Hachioji 192-0397, Japan*

<sup>c</sup> *PRESTO, Japan Science Technology Agency, Saitama 332-0012, Japan*

<sup>d</sup> *Advanced Institute for Materials Research (WPI-AIMR), Tohoku University, Sendai 980-8577, Japan*

\* [hideyuki.kawasoko.b7@tohoku.ac.jp](mailto:hideyuki.kawasoko.b7@tohoku.ac.jp)

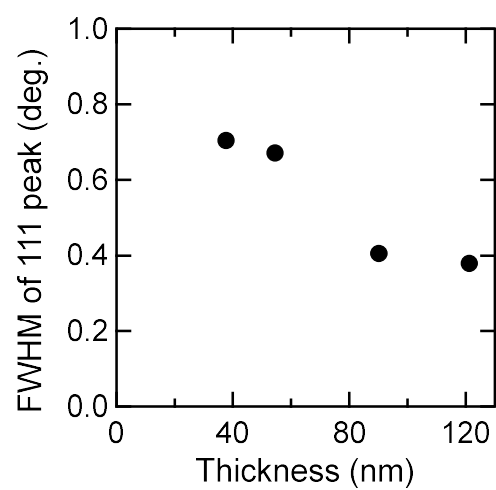

**Fig. S1** Full width at half maximum (FWHM) of the 111 diffraction peak for LaH<sub>2</sub> epitaxial thin films.

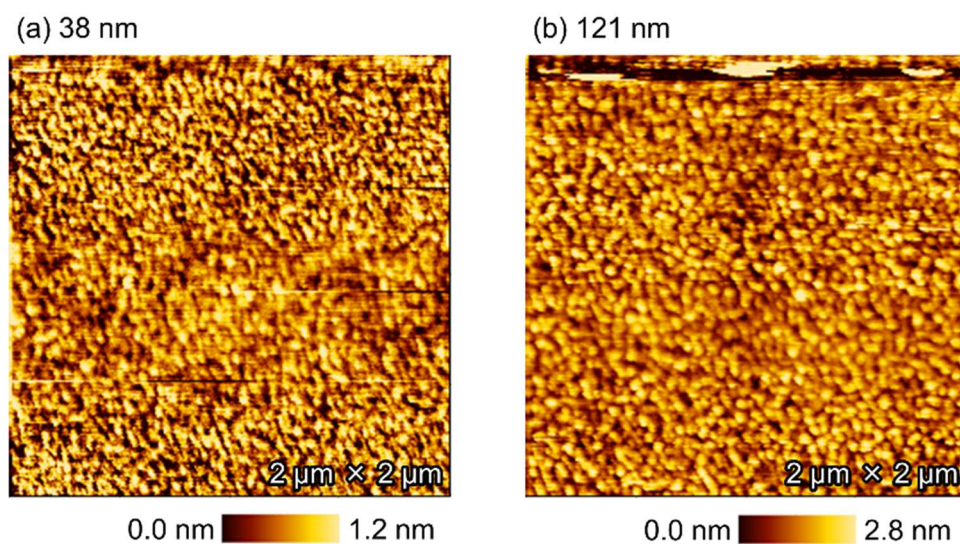

**Fig. S2** Atomic force microscope images for LaH<sub>2</sub> epitaxial thin films with the thickness of (a) 38 and (b) 121 nm. Root mean square roughness was 0.36 and 0.82 nm for the thickness of 38 and 121 nm, respectively.

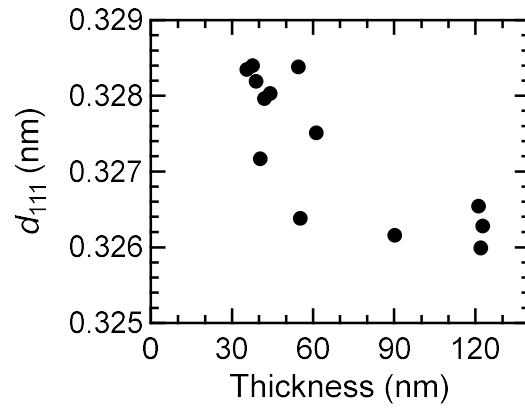

**Fig. S3** Thickness dependence of lattice spacing  $d_{111}$  for  $\text{LaH}_2$  epitaxial thin films as a function of thickness.

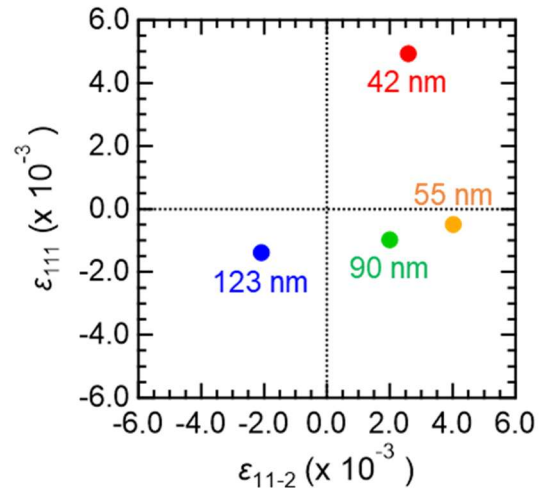

**Fig. S4** Mapping of out-of-plane and in-plane strain for LaH<sub>2</sub> epitaxial thin films with different thickness.

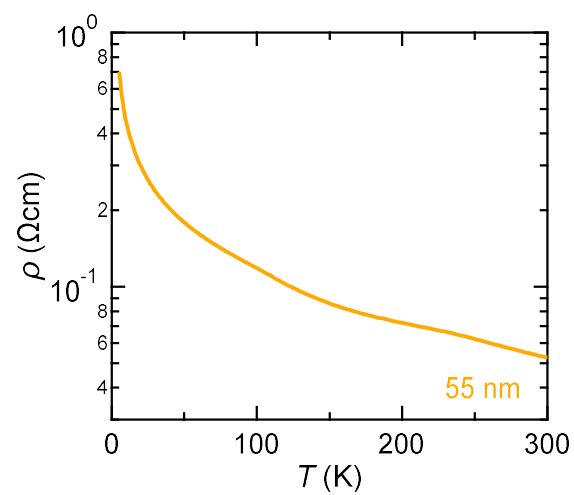

**Fig. S5** Temperature dependence of electrical resistivity of  $\text{LaH}_2$  epitaxial thin films with the thickness of 55 nm.
